# Supplementary material
Source: PubMed Central journal article supplement (PMC4118211)
Supplement: NIHMS606318-supplement-Graphical_Abstract.pdf [file NIHMS606318-supplement-Graphical_Abstract.pdf]

## Large-scale dissipative particle dynamics simulations of self-assembly amphiphilic systems

X. J. Li,<sup>a</sup> Y.-H. Tang,<sup>a</sup> H. J. Liang,<sup>\*bc</sup> and G. E. Karniadakis<sup>\*a</sup>

GPU-accelerated dissipative particle dynamics has been explored to probe the self-assembly of amphiphilic molecules in soft confined environment.

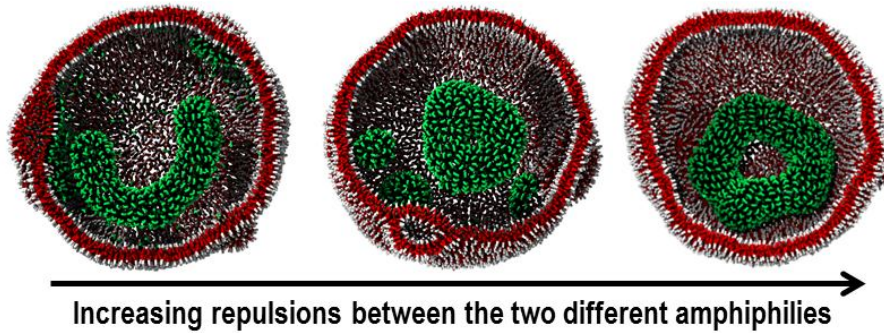

For Table of Contents use only
